# Supplementary material for: Using 3D observations with high spatio-temporal resolution to calibrate and evaluate a process-focused cellular automaton model of soil erosion by water
Source: Copernicus journal article supplement (doi:10.5194/soil-11-413-2025), 2025-06-12

## Equations used in RillGrow

*Infiltration* is calculated using the explicit Green-Ampt Model of Salvucci and Entekhabi (1994):

$$f(t)_{\{SE\}} = K_s \left\{ \frac{\sqrt{2}}{2} \tau^{\frac{-1}{2}} \frac{+2}{3} - \frac{\sqrt{2}}{6} \tau^{\frac{1}{2}} + \frac{1-\sqrt{2}}{3} \tau \right\} \quad \text{eq. S1}$$

$$\chi = \frac{\eta(H+\psi f)}{K_s} = \frac{S^2}{2K_s^2} \quad \text{eq. S2}$$

$$\tau = \frac{t}{t+\chi} \quad \text{eq. S3}$$

$f(t)_{\{SE\}}$  is the rate of infiltration

$\chi$  is time

$\tau$  is a dimensionless model variable.

## Reference

Salvucci, G. D. and Entekhabi, D. (1994). Explicit Expressions for Green-Ampt (Delta Function Diffusivity) Infiltration and Cumulative Storage, *Water Resour Res*, 30, 2661–2663, doi: 10.1029/94WR01494.

---

The *speed of overland flow* is calculated using the Darcy-Weisbach equation:

$$FS = \sqrt{\frac{K \cdot G \cdot Hr \cdot TS}{ff}} \quad \text{eq. S4}$$

$FS$  = flow speed

$K$  = constant

$G$  = gravitational acceleration

$Hr$  = hydraulic radius

$TS$  = top slope i.e. slope of cell-cell water surface

$ff$  = friction factor, here calculated as:

$$ff = A \cdot Re^B \quad \text{eq. S5}$$

$A$  = constant

$B$  = constant

$Re$  = Reynolds' number

---

*Splash redistribution* on a single cell is based on equation (20) in Planchon et al. (2000):

$$dZ = K \cdot KE \cdot \nabla^2 Z \quad \text{eq. S6}$$

$dZ$  = change in elevation

$K$  = constant

$KE$  = raindrop kinetic energy

$\nabla^2 Z$  = Laplacian

$$\nabla^2 Z = \frac{(z_{i+1,j} + z_{i-1,j} + z_{i,j+1} + z_{i,j-1} - 4z_{i,j})}{p^2} \quad \text{eq. S7}$$

$z_{i,j}$  = elevation of cell i,j

$p$  = cell size

### Reference

Planchon, O., Esteves, M., Silvera, N., and Lapetite, J. M. (2000). Raindrop erosion of tillage induced microrelief: possible use of the diffusion equation, Soil Tillage Res, 15–16, 1–14.

---

*Transport capacity* is calculated using equation (5) in Nearing et al. (1997):

$$\log(q_s) = \alpha + \beta \frac{e^{\gamma + \delta \log(\omega)}}{1 + e^{\gamma + \delta \log(\omega)}} \quad \text{eq. S8}$$

$q_s$  = unit sediment load

$\omega$  = stream power

$\alpha, \beta, \gamma, \delta$  = constants

### Reference

Nearing, M.A., Norton, L.D., Bulgakov, D.A., Larionov, G.A., West, L.T. and Dontsova, K. (1997). Hydraulics and erosion in eroding rills. Water Resources Research 33(4), 865-876

---

*Flow detachment* is calculated using equation (10) in Nearing (1991):

$$e = K \cdot C \cdot P \cdot h^{0.5} \cdot S^{1.5} \quad \text{eq. S9}$$

$e$  = detachment rate per unit area

$K$  = constant

$C$  = Chezy coefficient:

$$C = \left(8 \cdot \frac{g}{f}\right)^{0.5} \quad \text{eq. S10}$$

$g$  = gravitational constant

$f$  = Darcy-Weisbach friction factor

$$f = \frac{(8 \cdot g \cdot h \cdot S)}{u^2} \quad \text{eq. S11}$$

$h$  = water depth

$S$  = slope

$u$  = flow speed

$$P = \frac{1}{2} - \frac{\Psi(T - \tau_b)}{s_T^2 + s_\tau^2} \quad \text{eq. S12}$$

$\Psi$  = cumulative probability function of a standard normal deviate (here calculated using an approximation from Abramowitz & Stegun, 1965)

$T, S_T, S_\tau$  = constants

$\tau_b$  = constant  $\cdot \tau$

$$\tau = \rho \cdot g \cdot h \cdot S \quad \text{eq. S13}$$

$\rho$  = density of water

### References

Abramowitz, M. and Stegun, I.A. (Eds.) (1965). Handbook of Mathematical Functions with Formulas, Graphs, and Mathematical Tables. Dover Publications Inc., New York, 1046 p.

Nearing, M.A. (1991). A probabilistic model of soil detachment by shallow turbulent flow. Transactions of the American Society of Agricultural Engineers 34(1), 81-85.

---

*Deposition* is given by equation 12 in Lei et al. (1998):

$$D = \frac{(SL-TC)}{(SL+TC)} \quad \text{eq. S14}$$

where:

D = deposition

SL = sediment load

TC = transport capacity

#### **Reference**

Lei, T., M. A. Nearing, K. Haghighi, and V. F. Bralts (1998). Rill erosion and morphological evolution: A simulation model, Water Resour. Res., 34(11), 3157–3168, doi:10.1029/98WR02162.

---

**Table S1: Range of RillGrow model parameters for sampling with the LHC approach**

| Field experiment                                                                 | Min      | Max      |
|----------------------------------------------------------------------------------|----------|----------|
| Constant n for splash efficiency [ $\text{sec}^2 \text{kg}^{-1} \text{m}^{-1}$ ] | 5.00E+10 | 2.50E+13 |
| Base level e.g. distance below lowest DEM point to flume lip [cm]                | 5        | 50       |
| Maximum flow speed [ $\text{mm sec}^{-1}$ ]                                      | 500      | 1100     |
| Constant k for detachment [ $\text{kg m}^{-3}$ ]                                 | 0.3      | 0.9      |
| Radius of soil shear stress 'patch' [mm]                                         | 20       | 120      |
| When saturated, threshold shear stress for slumping [ $\text{kg m s}^{-2}$ ]     | 0.1      | 5        |
| Angle of rest for saturated slumped sediment [%]                                 | 10       | 110      |
| Laboratory experiment                                                            | Min      | Max      |
| Constant n for splash efficiency [ $\text{sec}^2 \text{kg}^{-1} \text{m}^{-1}$ ] | 5.00E+10 | 2.50E+13 |
| Base level e.g. distance below lowest DEM point to flume lip [cm]                | 5        | 50       |
| Maximum flow speed [ $\text{mm sec}^{-1}$ ]                                      | 500      | 1200     |
| Constant k for detachment [ $\text{kg m}^{-3}$ ]                                 | 0.3      | 0.9      |
| Radius of soil shear stress 'patch' [mm]                                         | 20       | 120      |
| When saturated, threshold shear stress for slumping [ $\text{kg m s}^{-2}$ ]     | 0.1      | 5        |
| Angle of rest for saturated slumped sediment [%]                                 | 10       | 110      |

**Figure S1: Range of parameters of best 30 models for different combinations objective functions at the field experiment. Note that y-axis starts at 0.3. The column colours correspond to the consideration of EC, SY or SY and EC. The objective functions and their abbreviations are explained in table 2 in the manuscript.**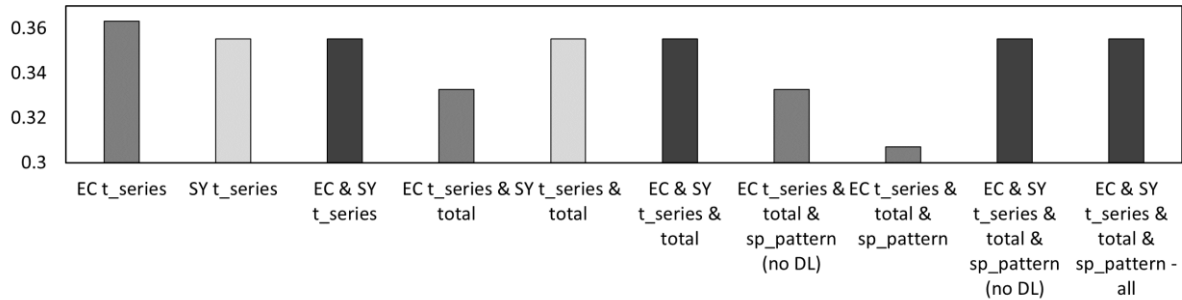**Figure S2: Range of parameters of best 30 models for different combinations objective functions at the laboratory experiment. Note that the y-axis values start at 0.2. The objective functions and their abbreviations are explained in table 2 in the manuscript.**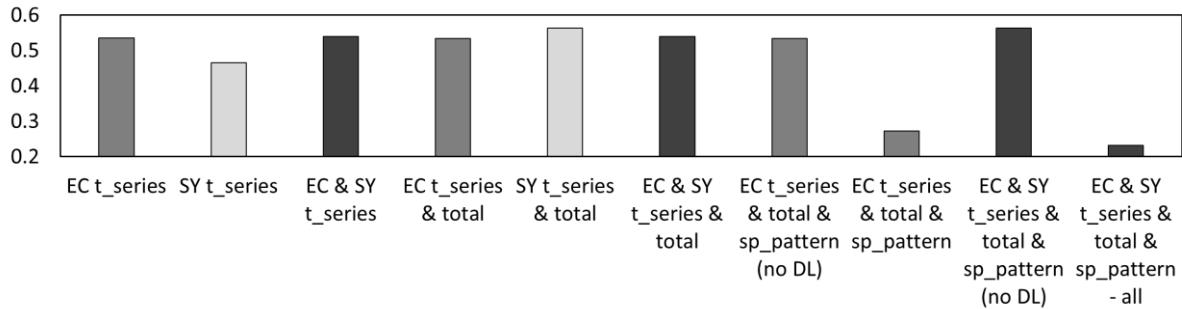

**Figure S3: Scatter matrix of metrics according to different objective functions for the field experiment before filtering for unplaussible models (EC in m, except sim DL that has no unit; SY in kg).**

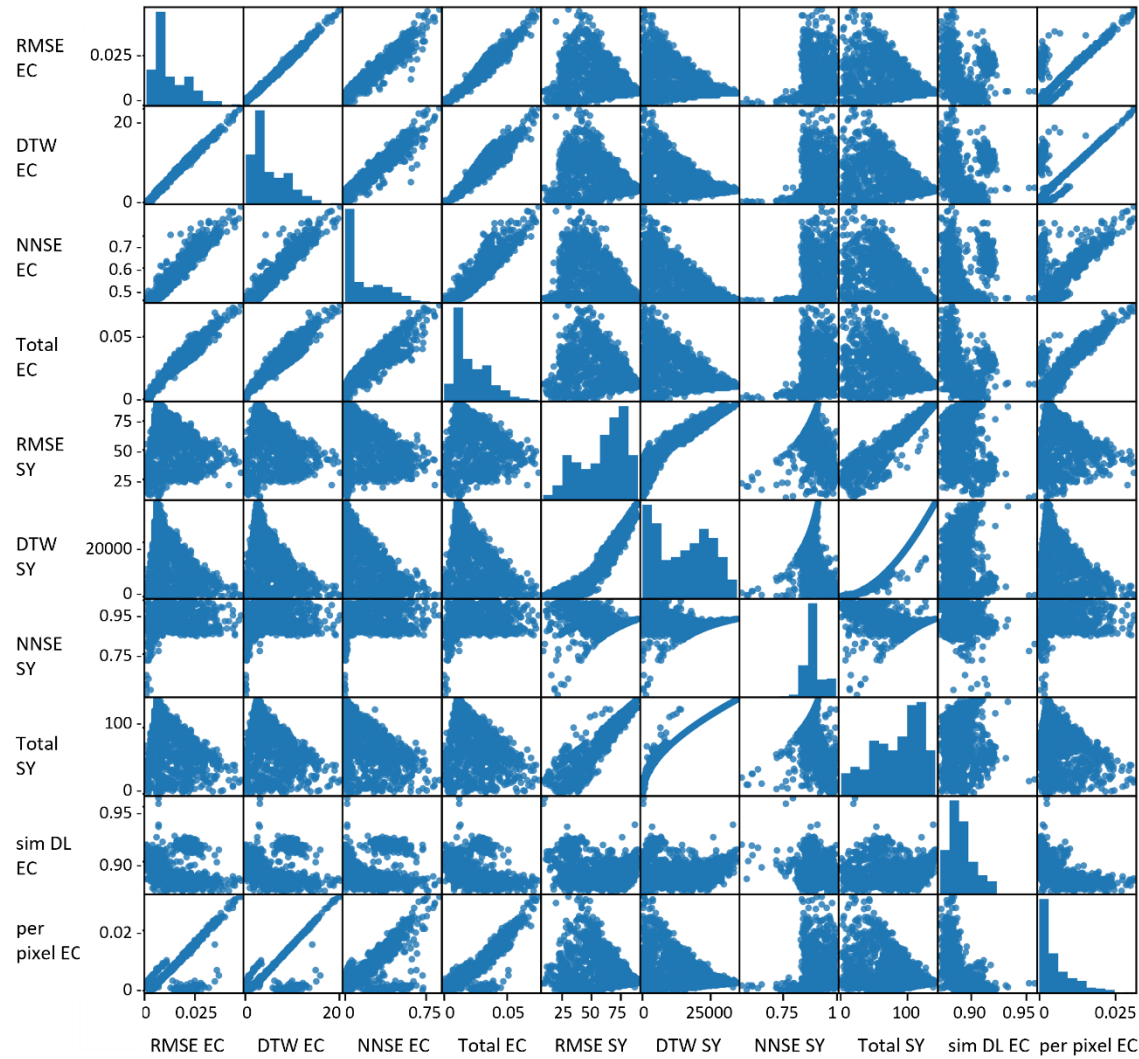

**Figure S4: Scatter plot for the field experiment for the model parameter DEM base level and different metrics of the objective functions.**

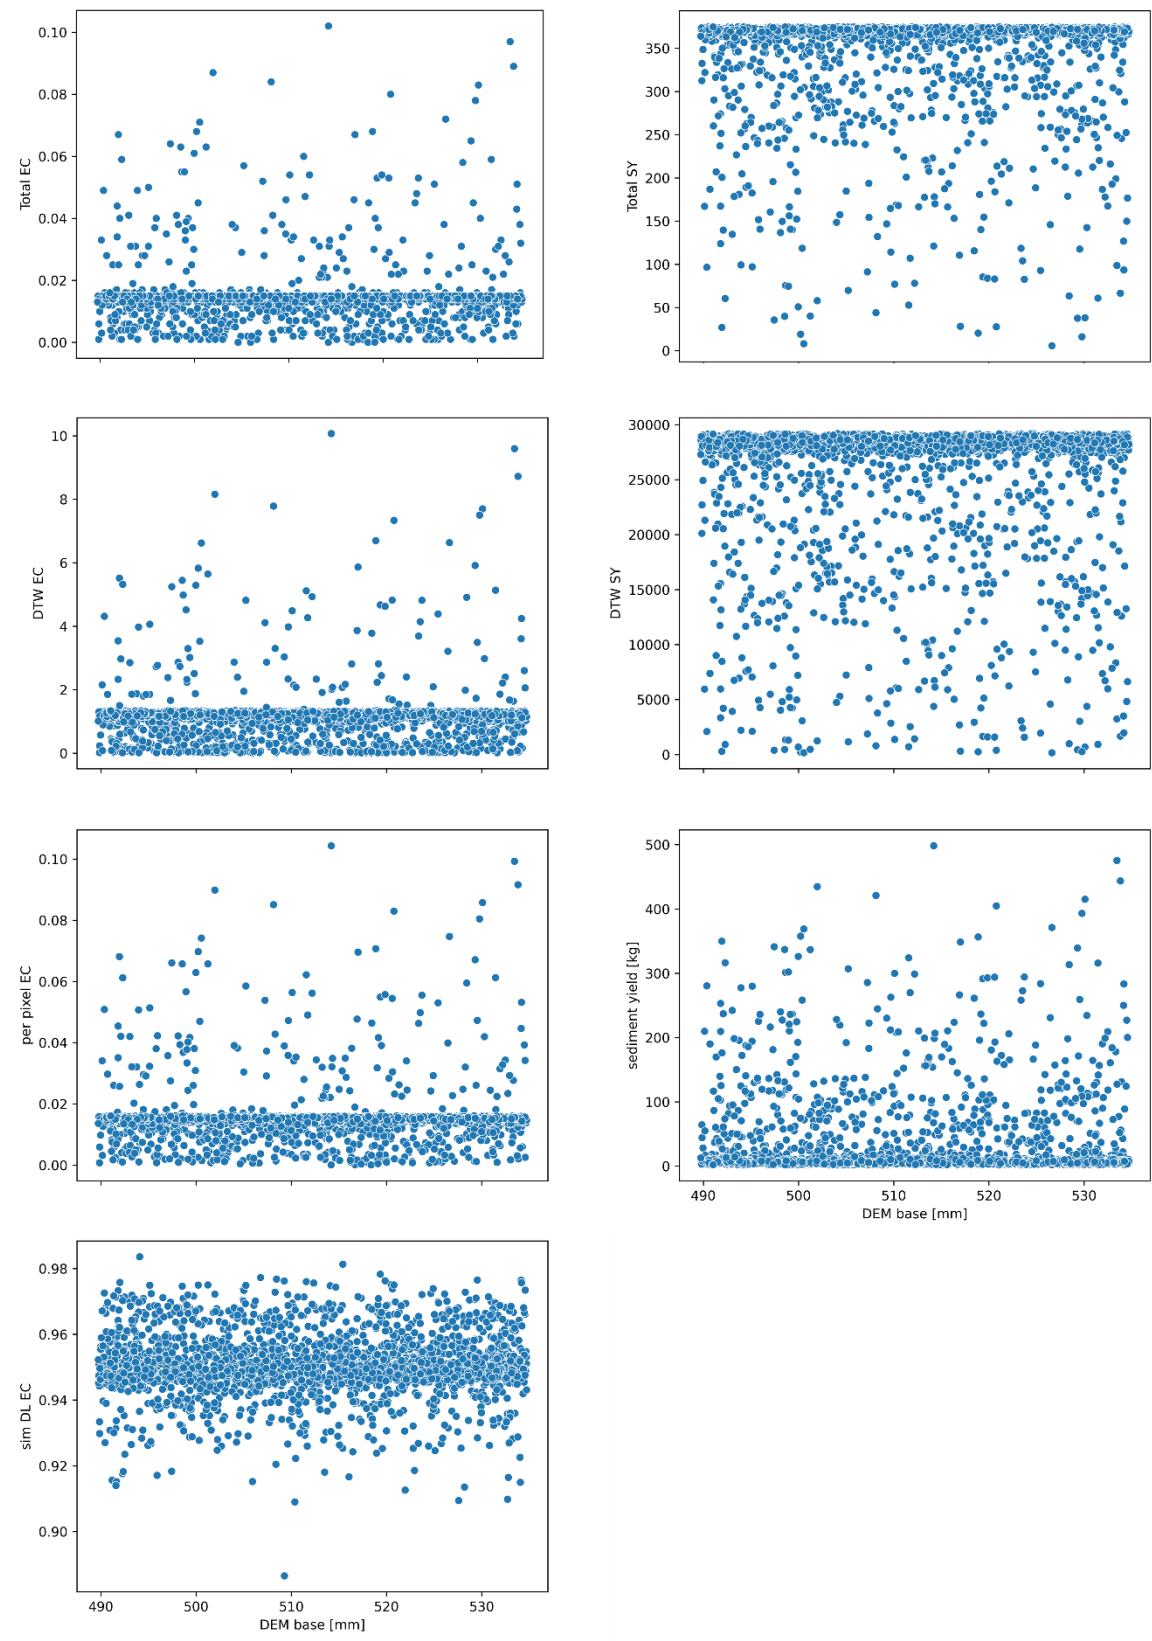

**Figure S5: Scatter plot for the field experiment for the model parameter splash efficiency and different metrics of the objective functions.**

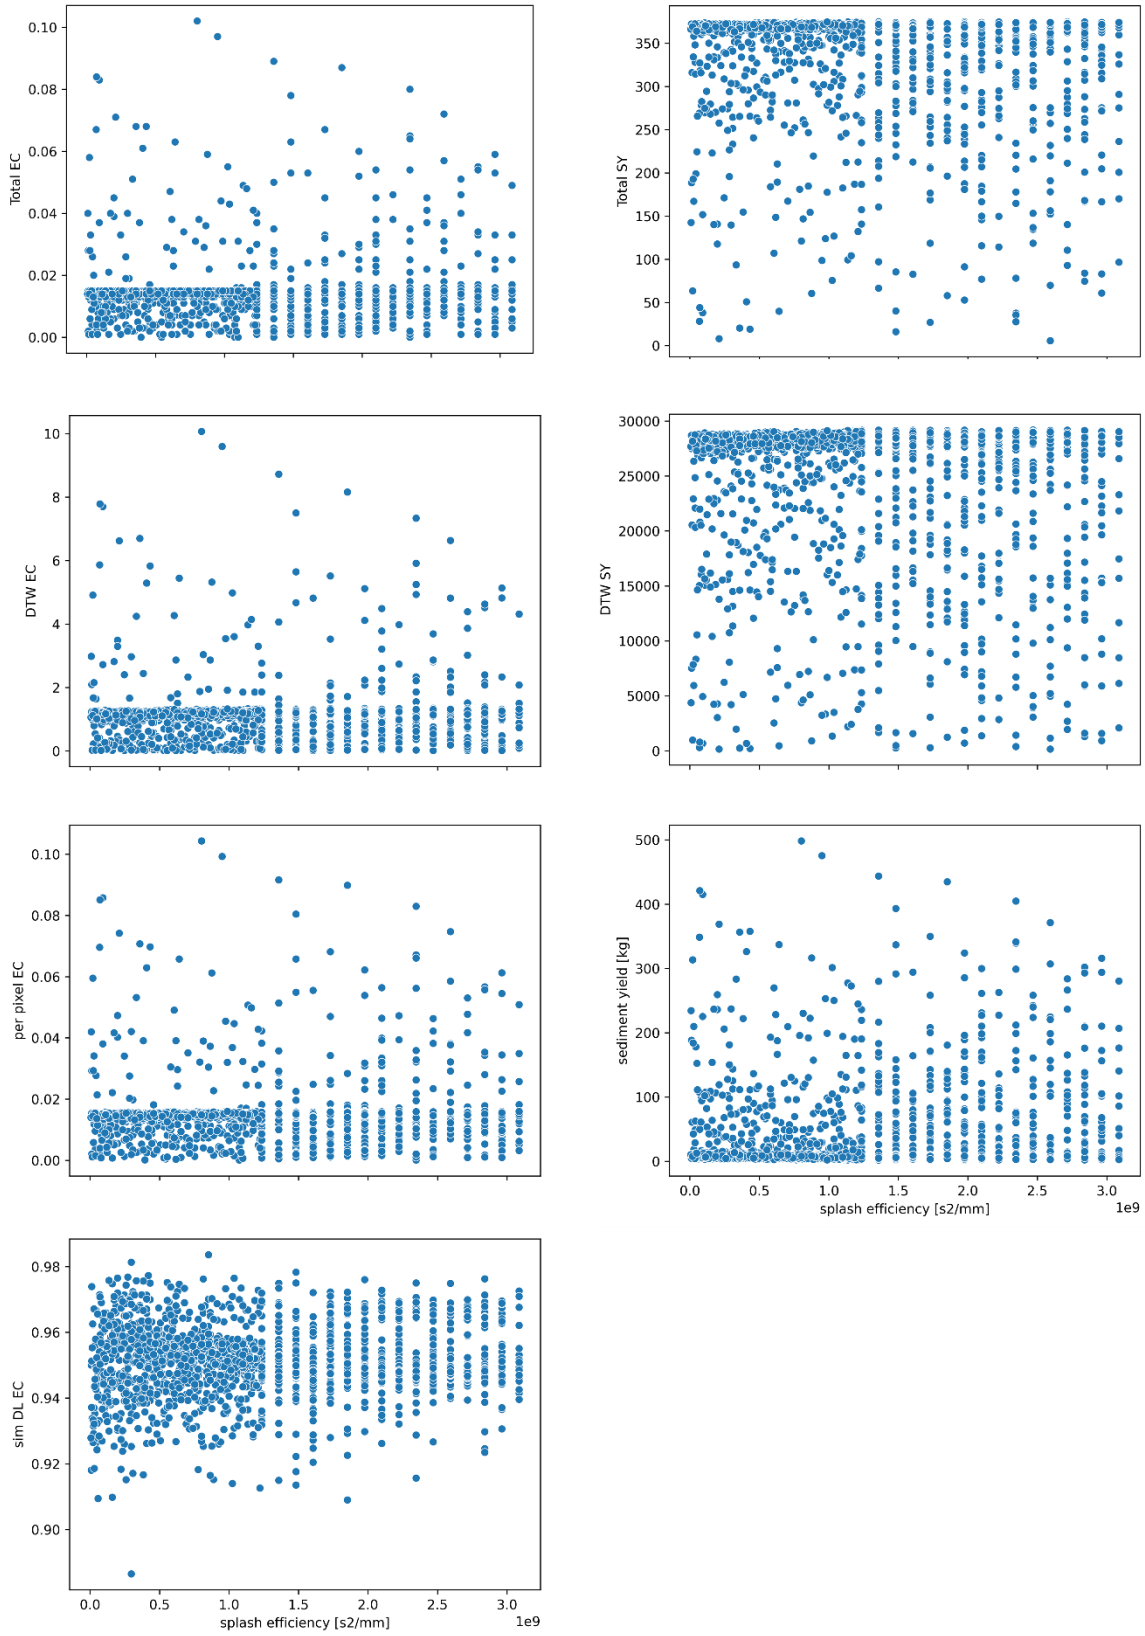

**Figure S6: Scatter plot for the field experiment for the model parameter maximum flow velocity and different metrics of the objective functions.**

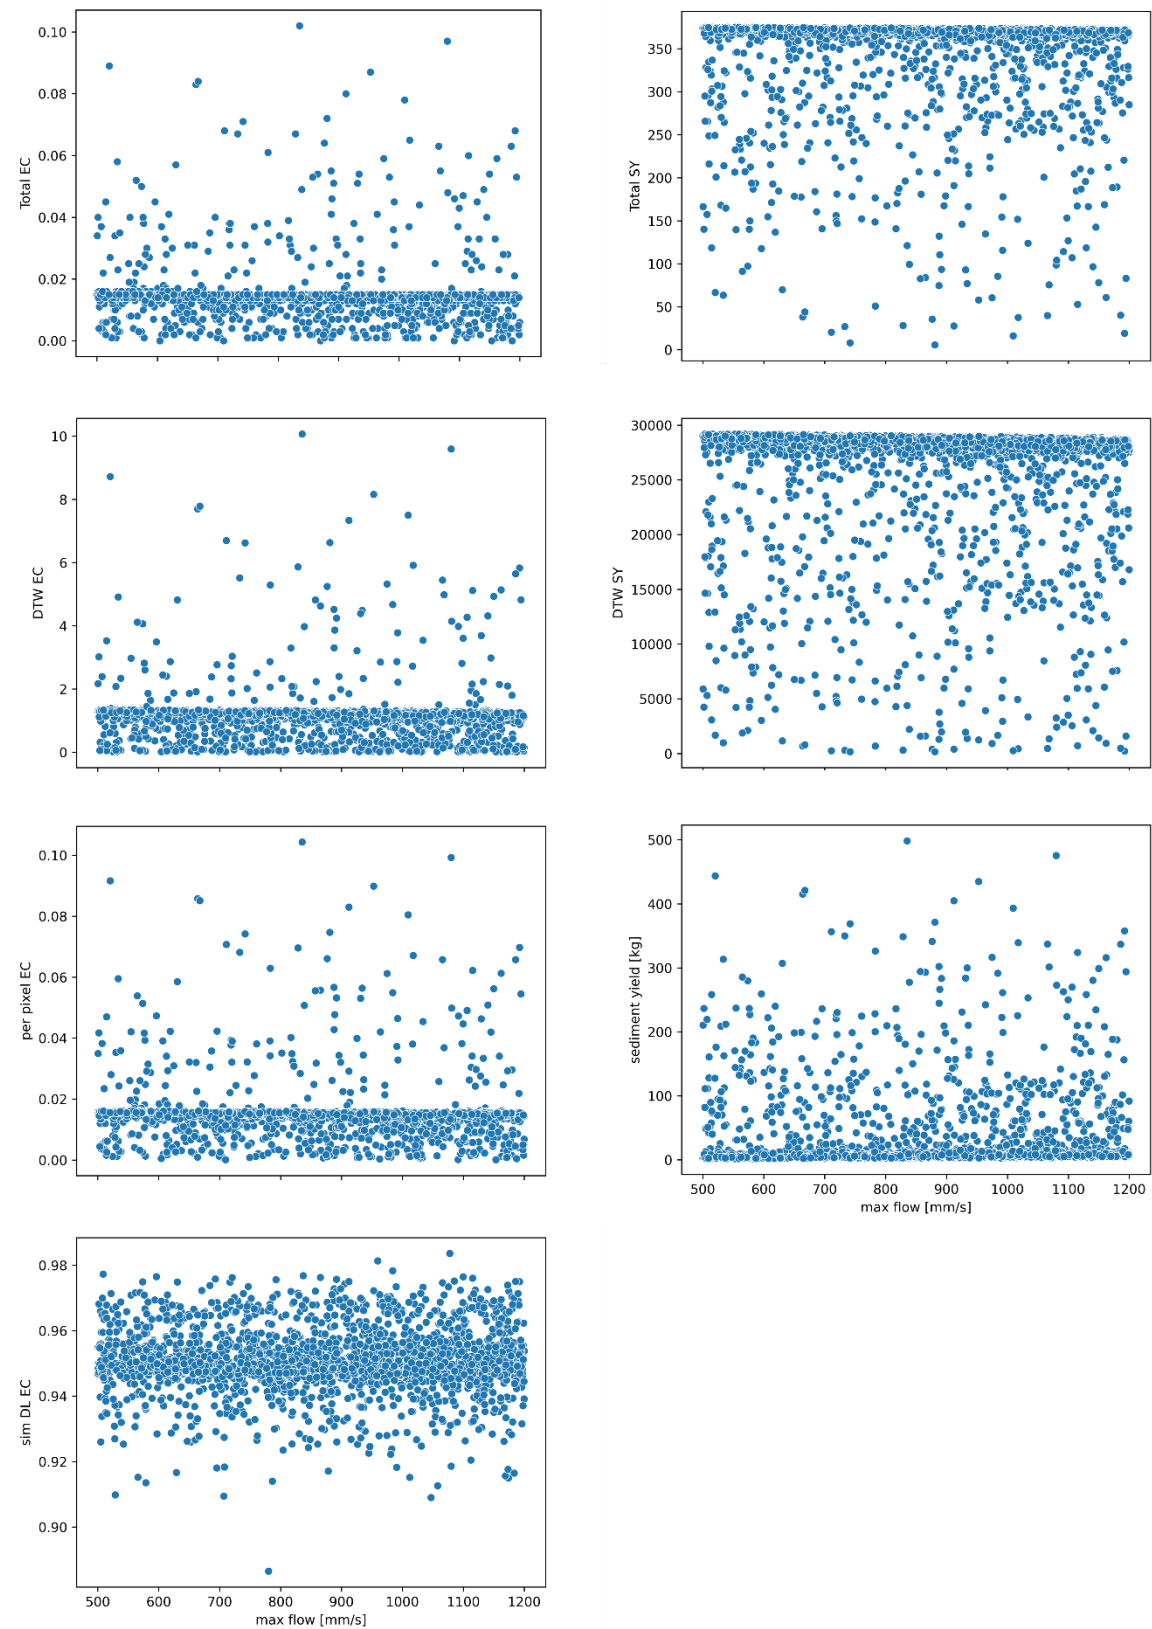



**Figure S7: Scatter plot for the field experiment for the model parameter flow detachment and different metrics of the objective functions.**

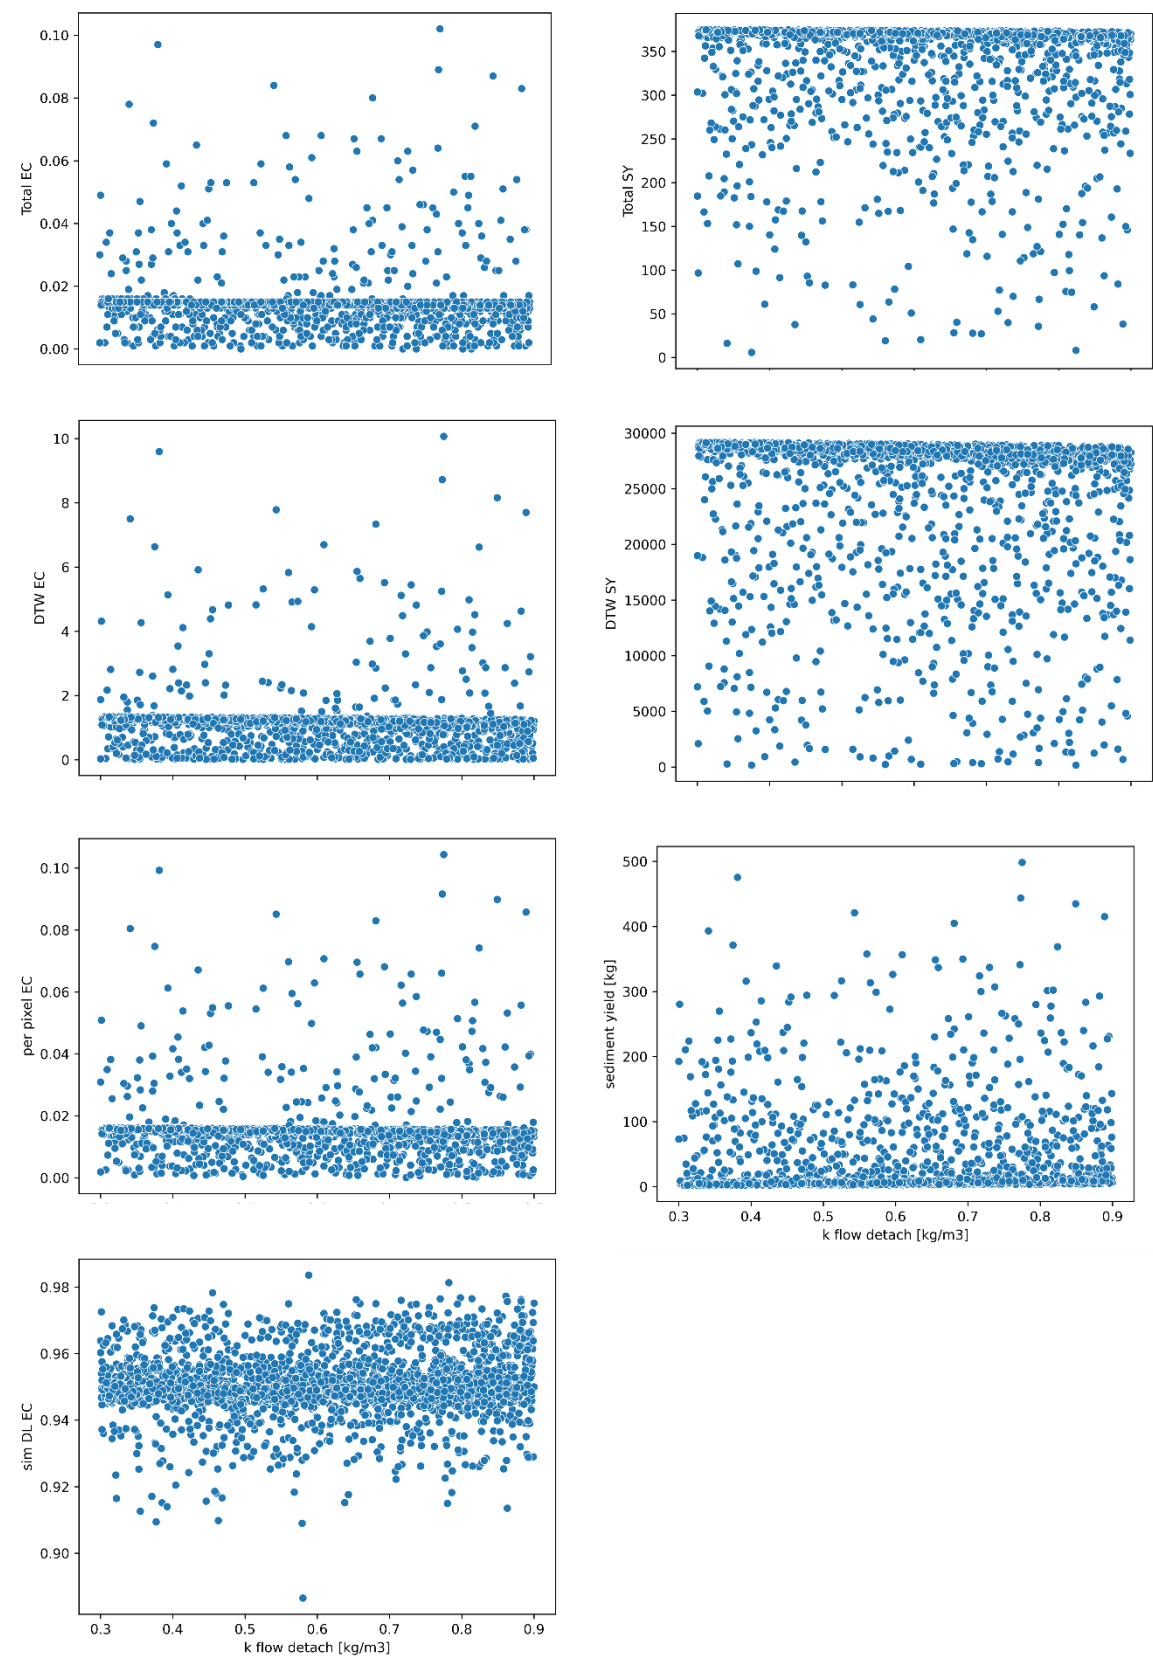

**Figure S8: Scatter plot for the field experiment for the model parameter radius of soil shear stress and different metrics of the objective functions.**

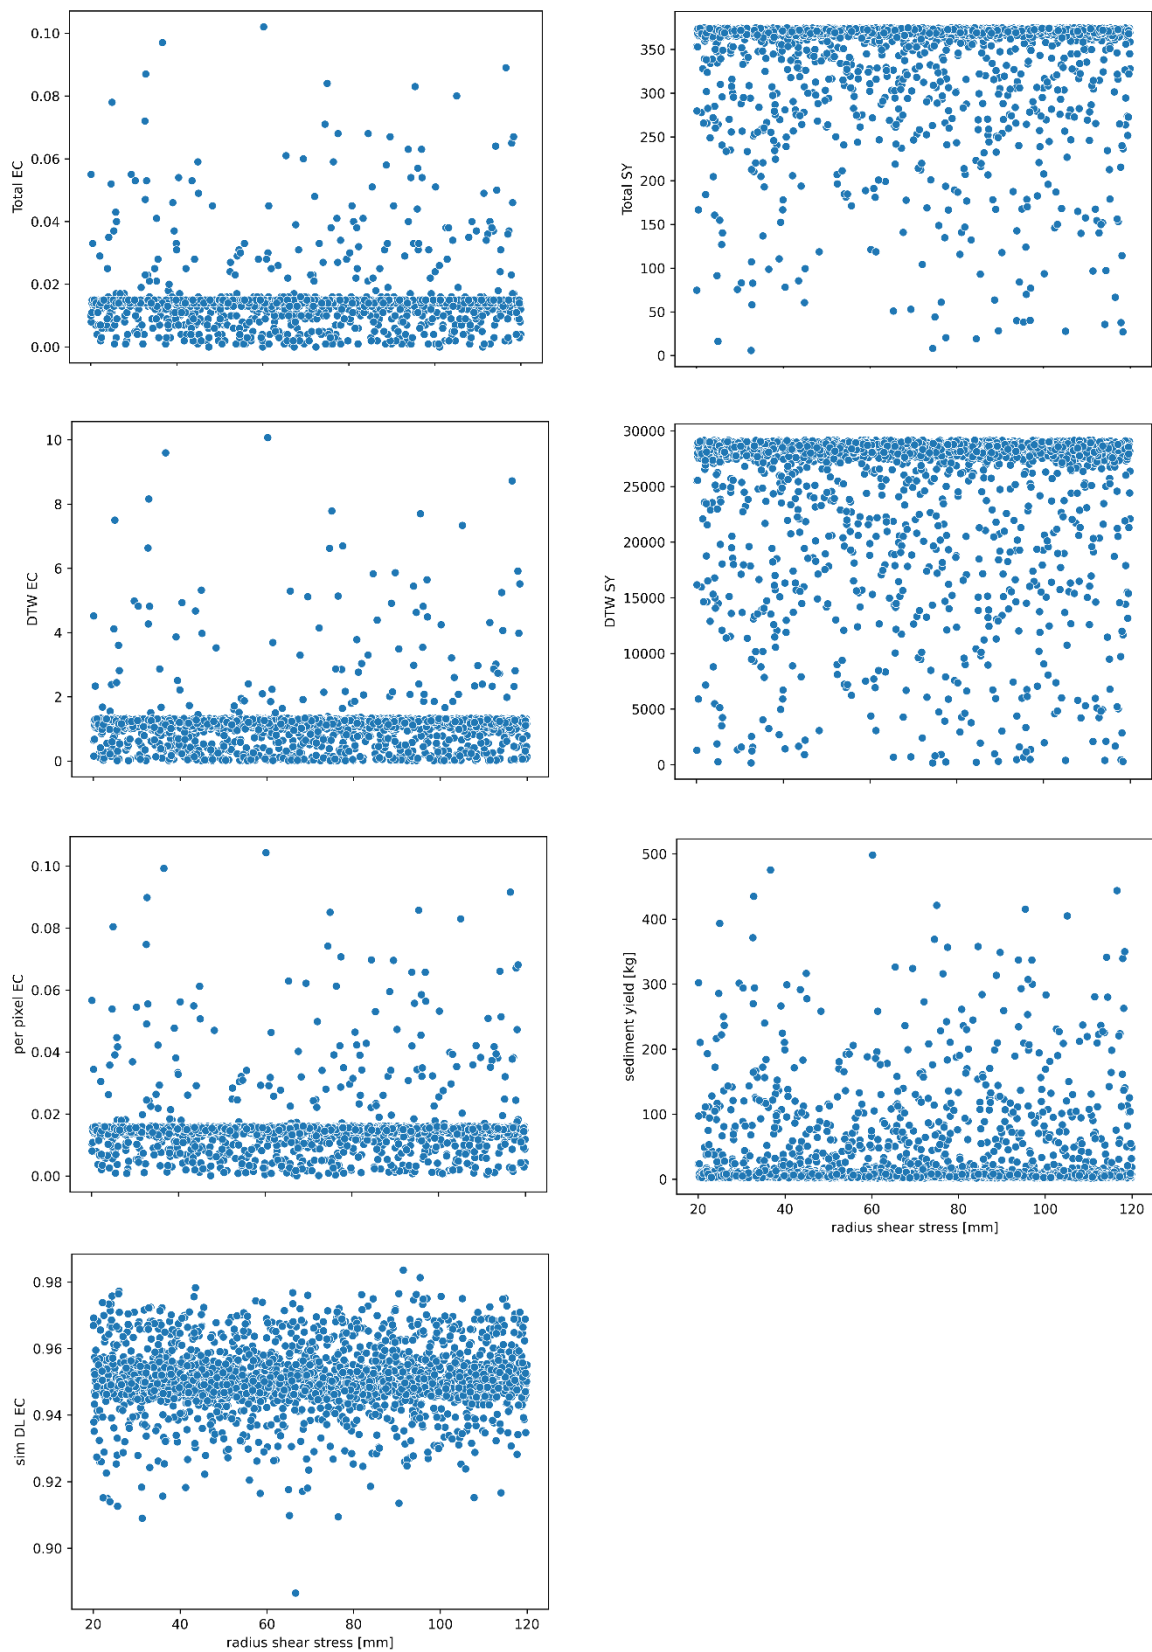

**Figure S9: Scatter plot for the field experiment for the model parameter threshold shear stress for slumping and different metrices of the objective functions.**

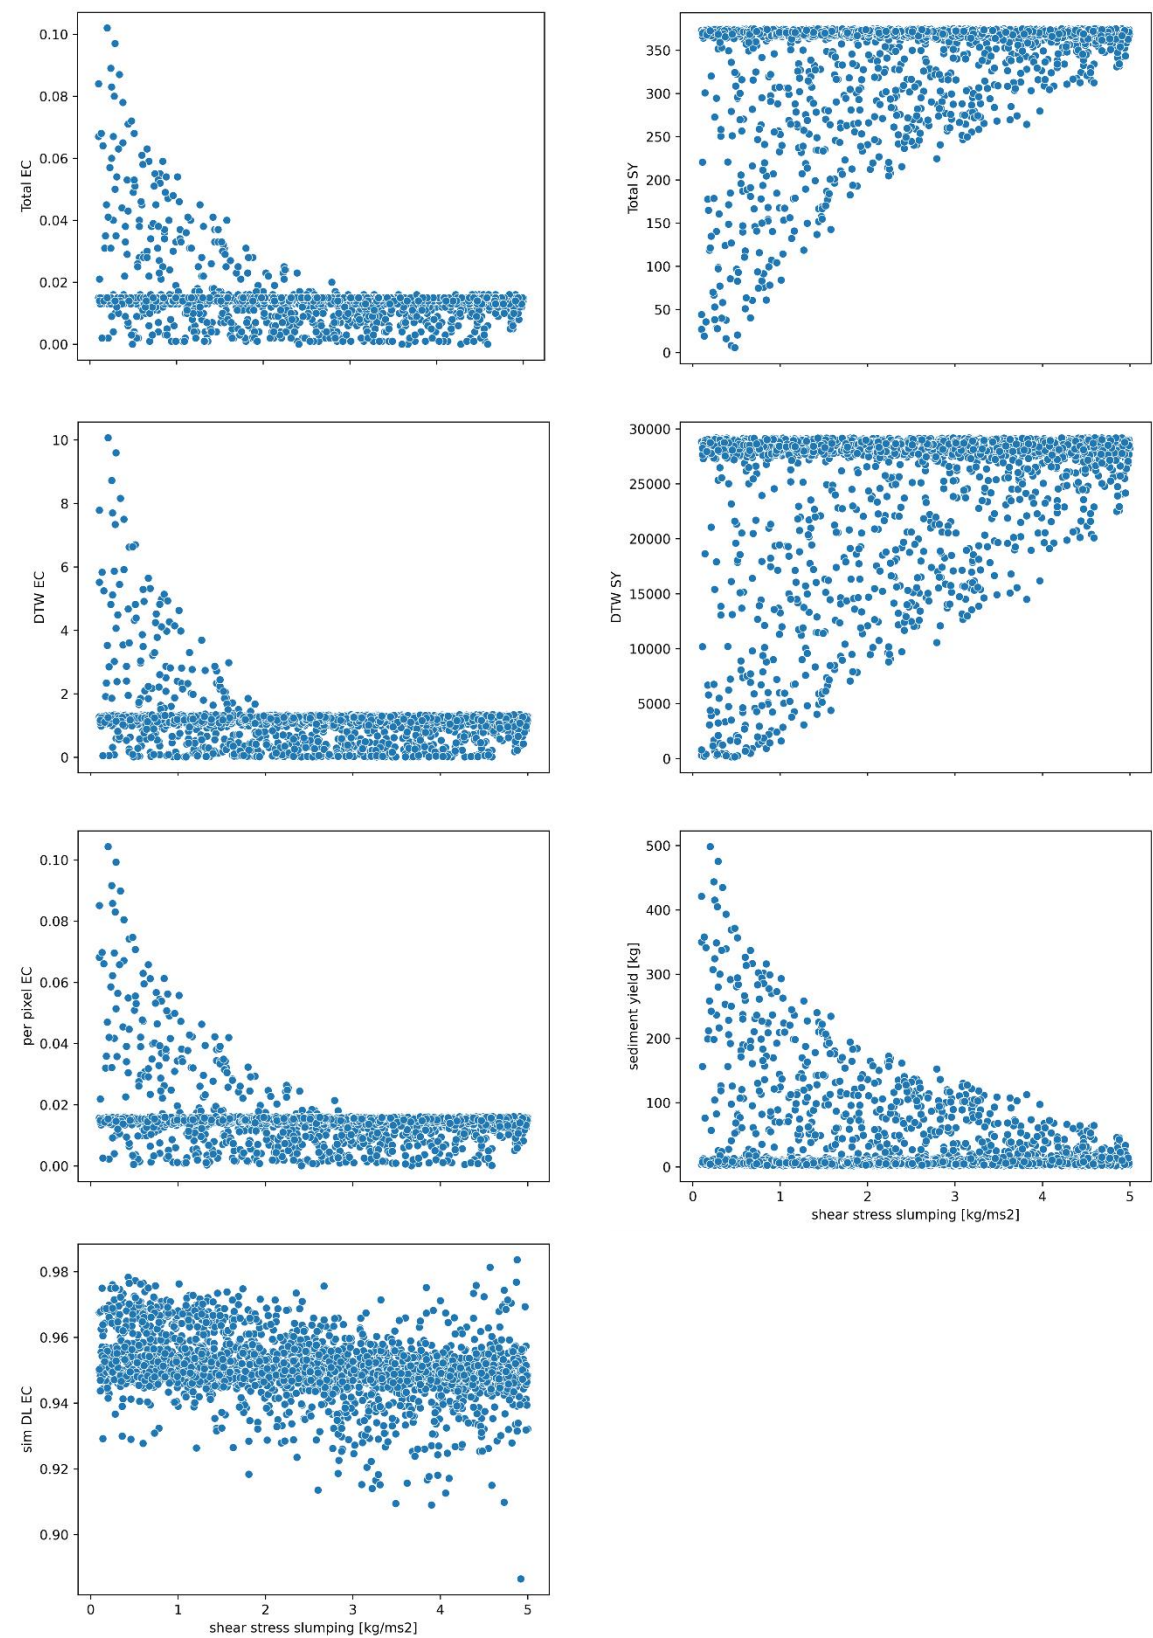

**Figure S10: Scatter plot for the field experiment for the model parameter angle of rest for slumped soil and different metrics of the objective functions.**

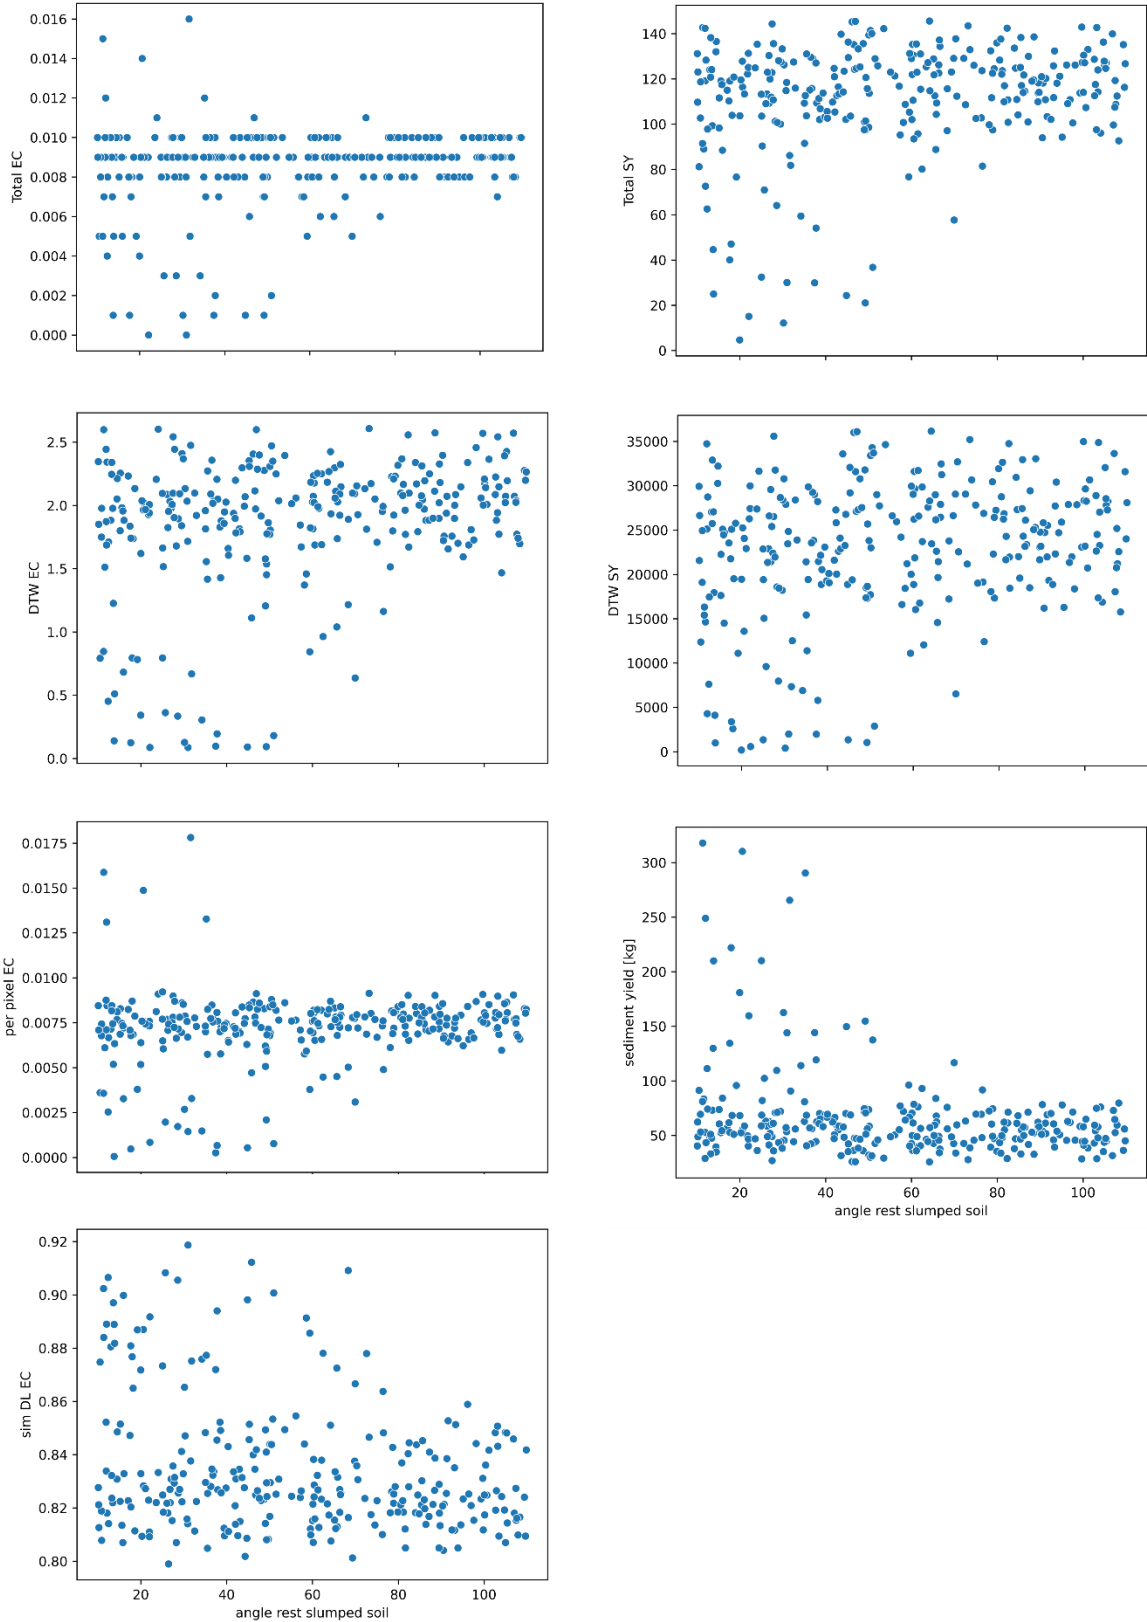

**Figure S11: Scatter plot for the laboratory experiment for the model parameter DEM base level and different metrics of the objective functions.**

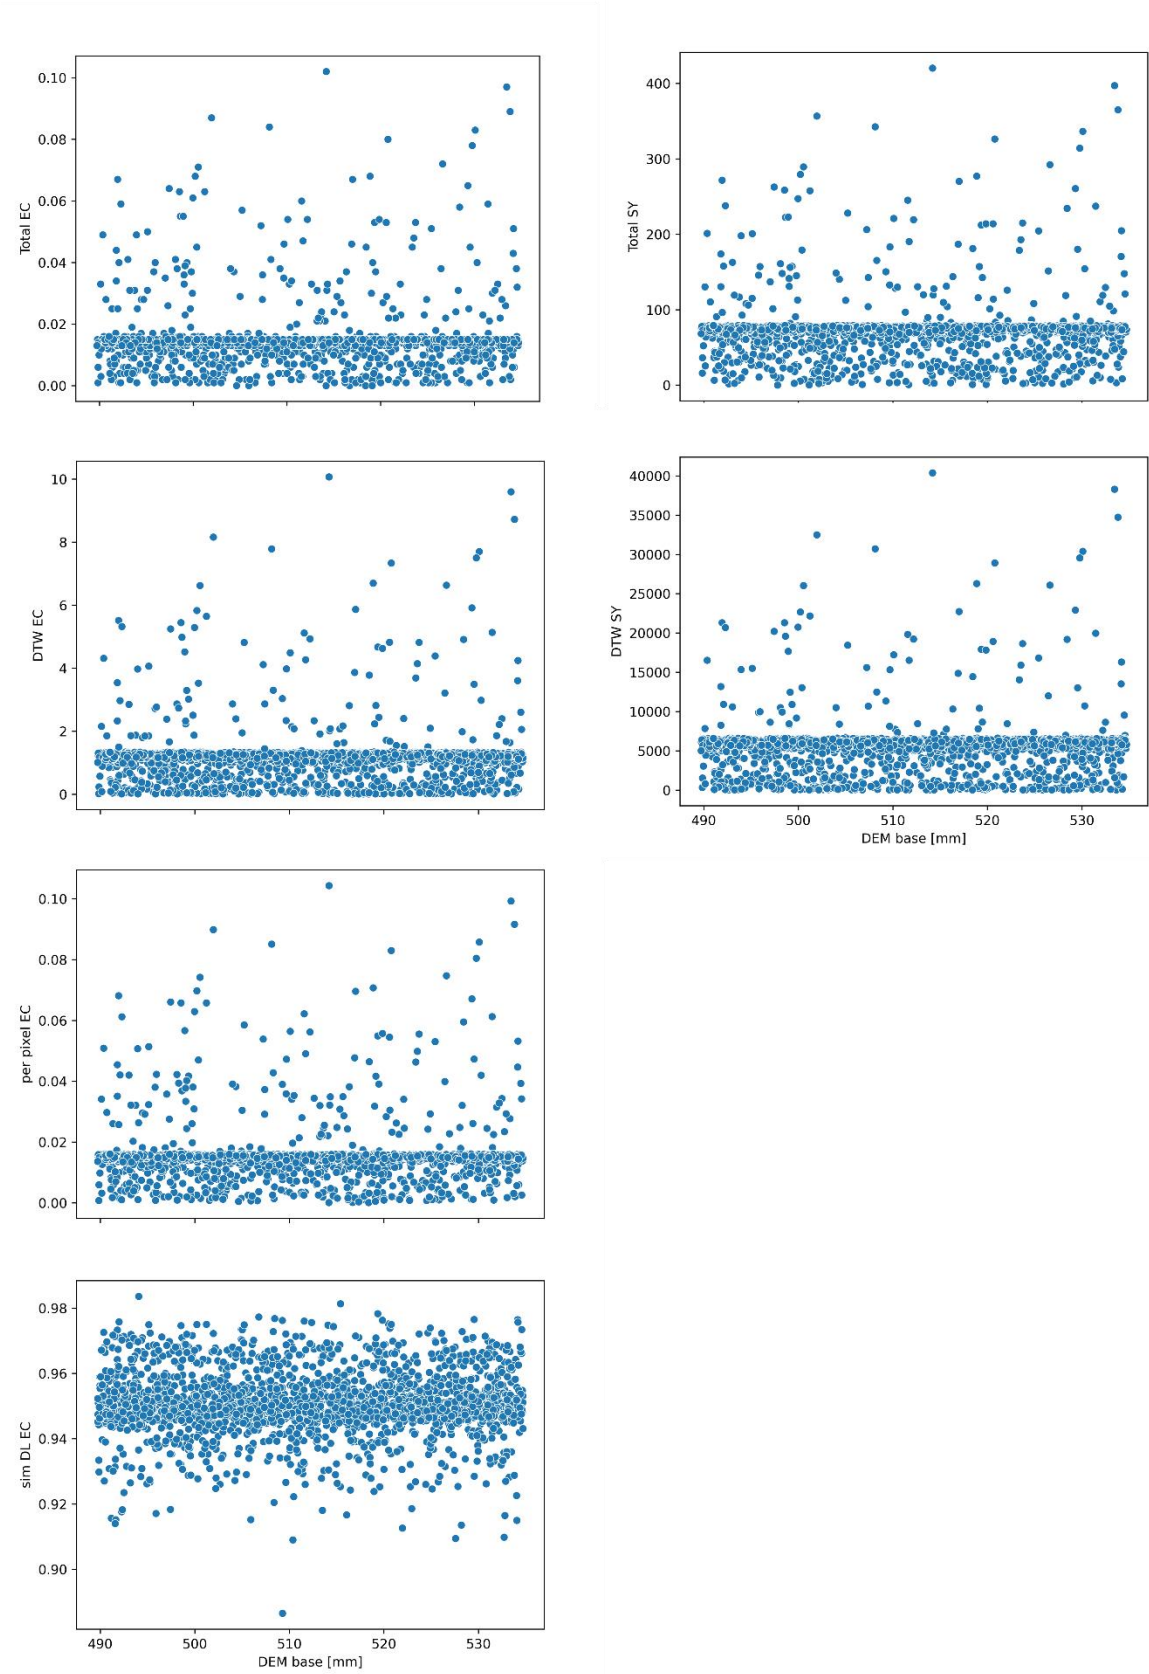



**Figure S12: Scatter plot for the laboratory experiment for the model parameter splash efficiency and different metrics of the objective functions.**

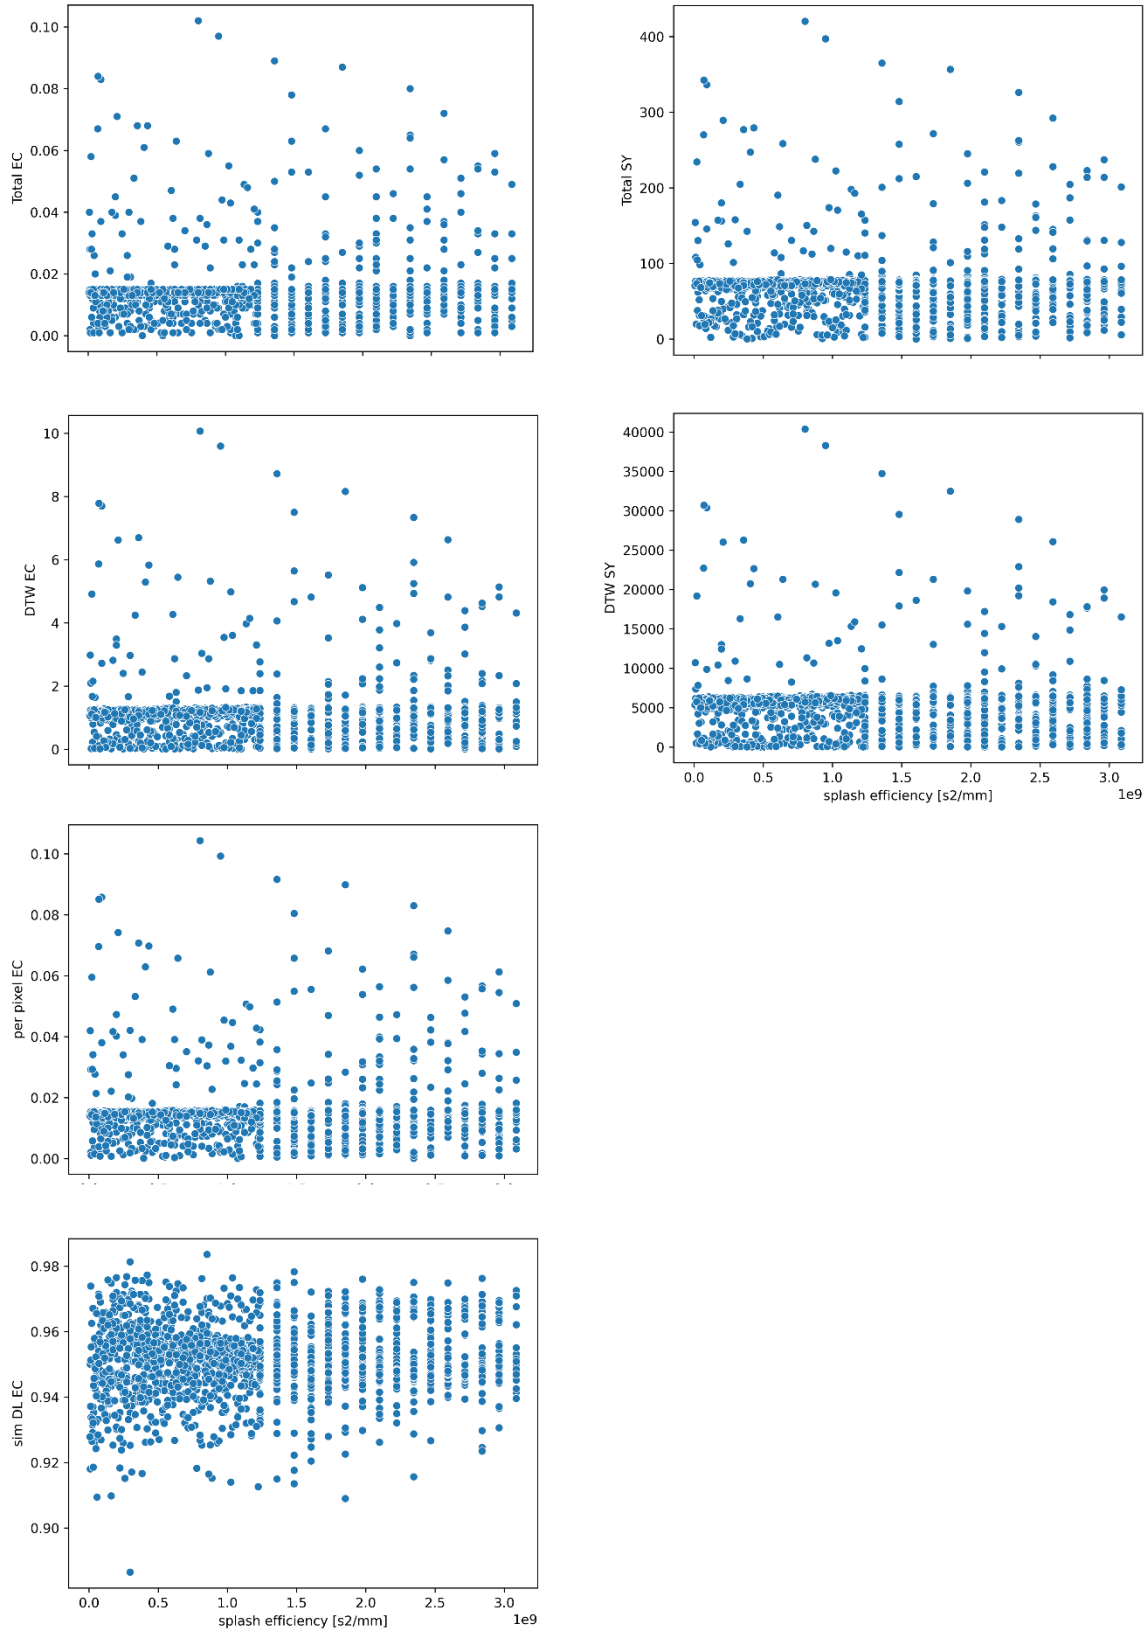

**Figure S13: Scatter plot for the laboratory experiment for the model parameter maximum flow velocity and different metrices of the objective functions.**

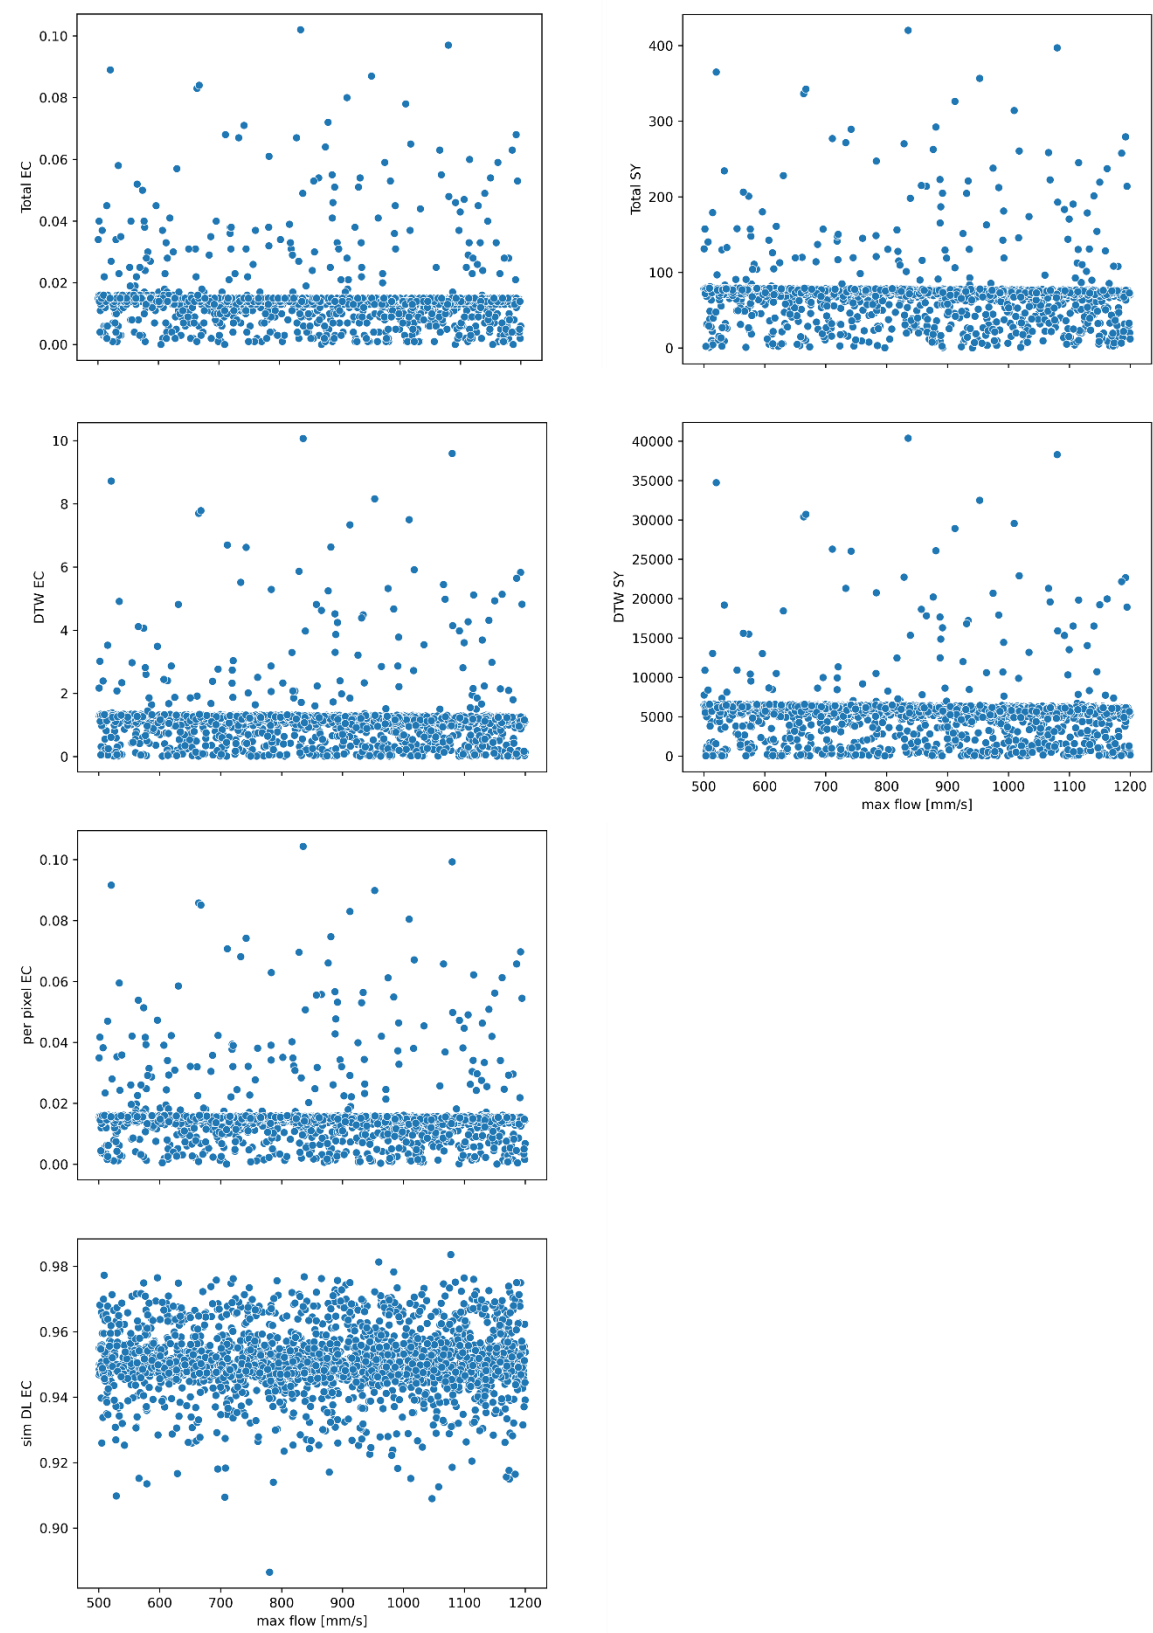

**Figure S14: Scatter plot for the laboratory experiment for the model parameter flow detachment and different metrics of the objective functions.**

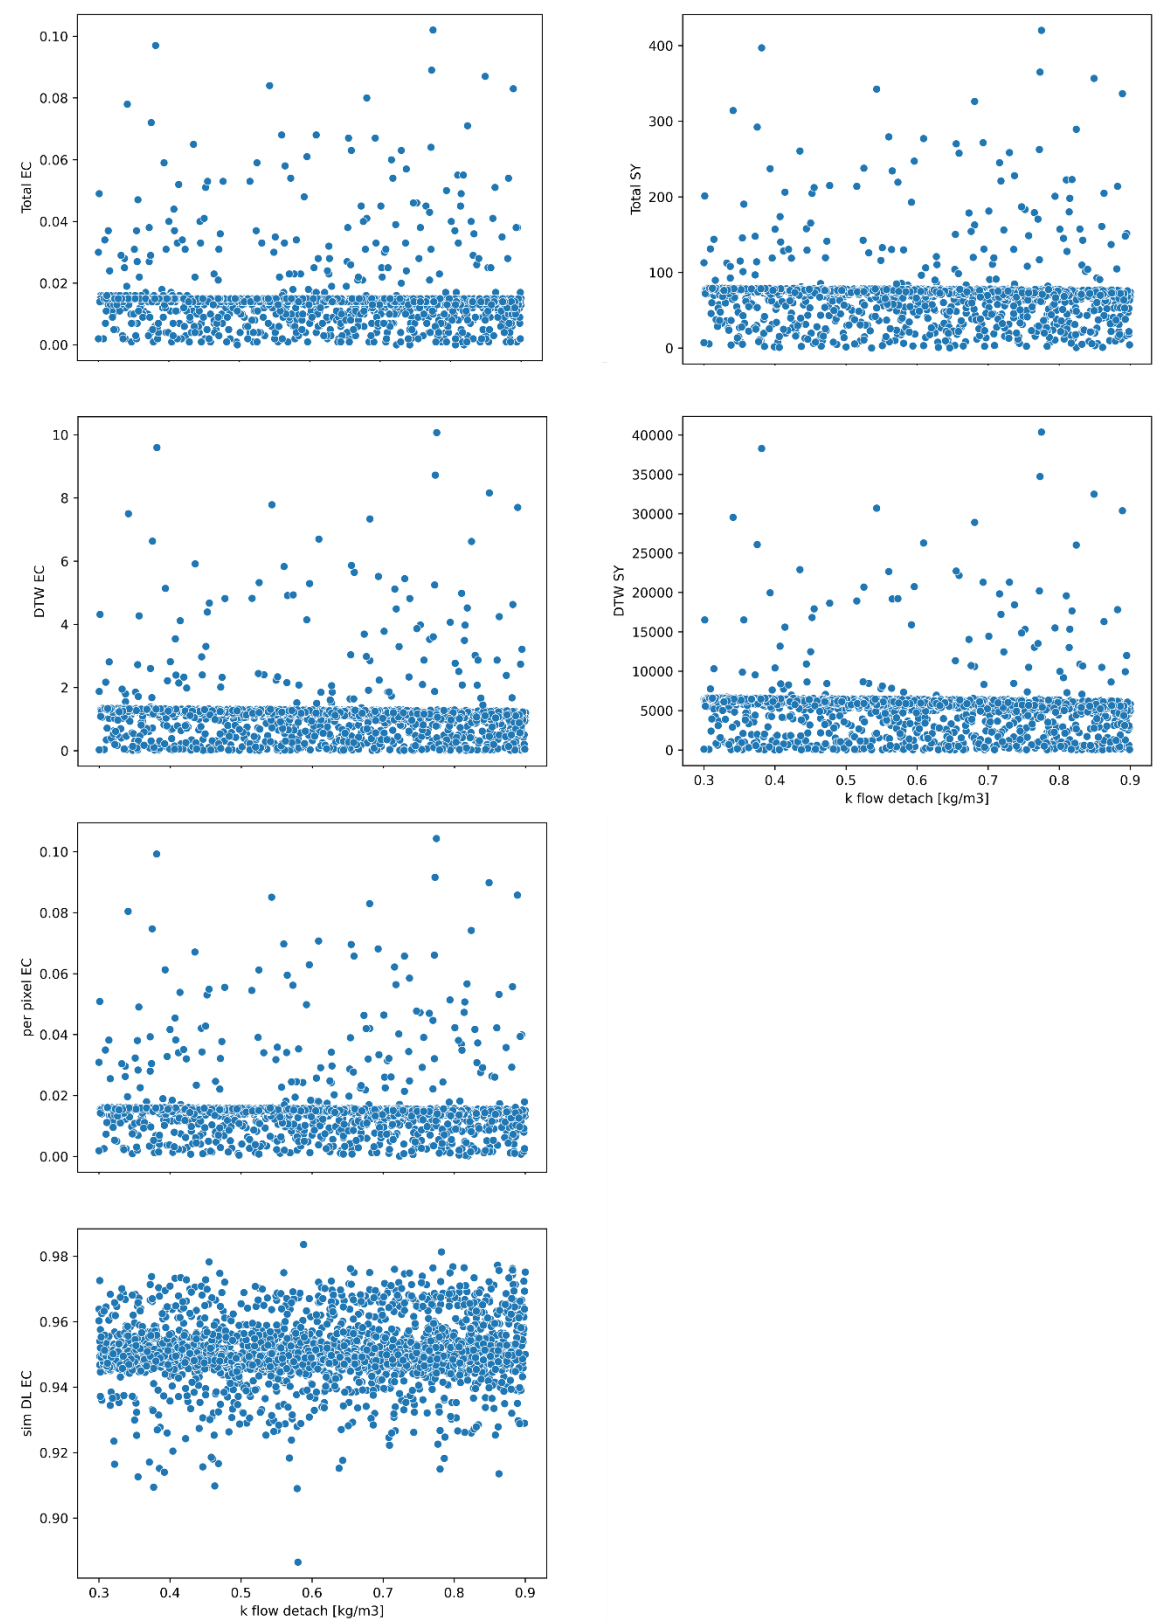



**Figure S15: Scatter plot for the laboratory experiment for the model parameter radius of soil shear stress and different metrices of the objective functions.**

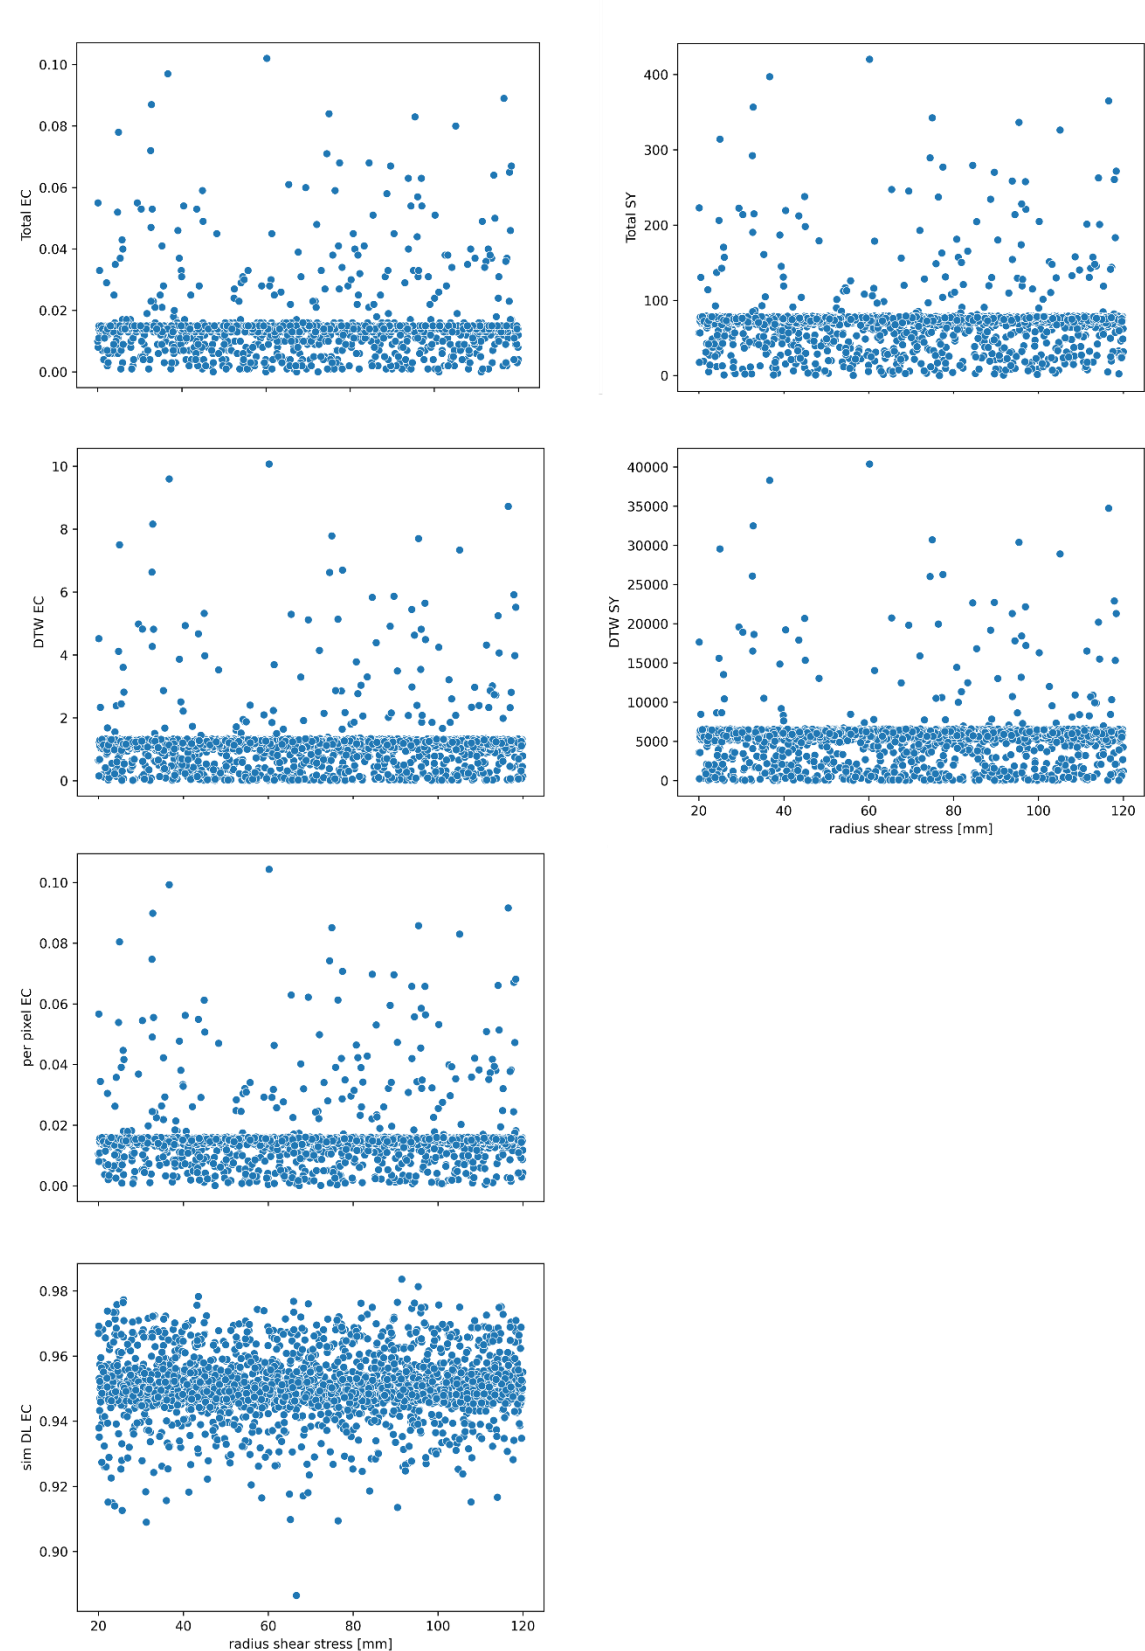

**Figure S16: Scatter plot for the laboratory experiment for the model parameter threshold shear stress for slumping and different metrics of the objective functions.**

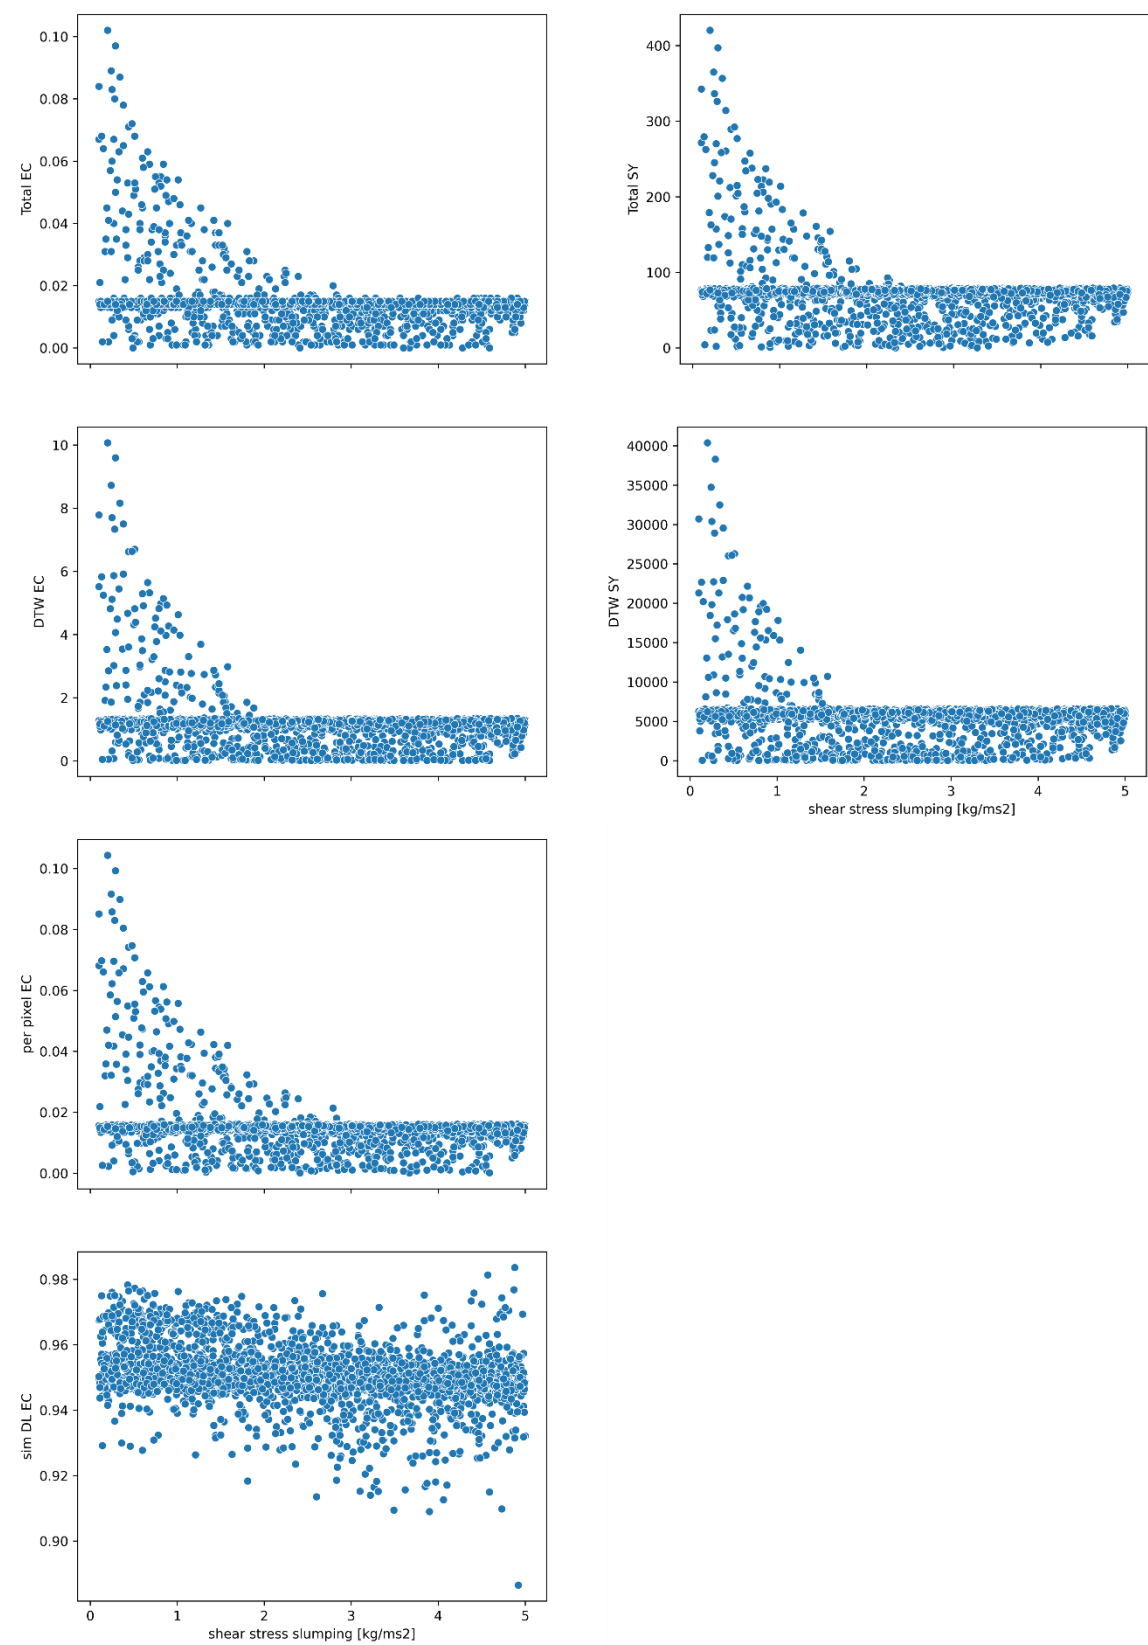

**Figure S17: Scatter plot for the laboratory experiment for the model parameter angle of rest for slumped soil and different metrices of the objective functions.**

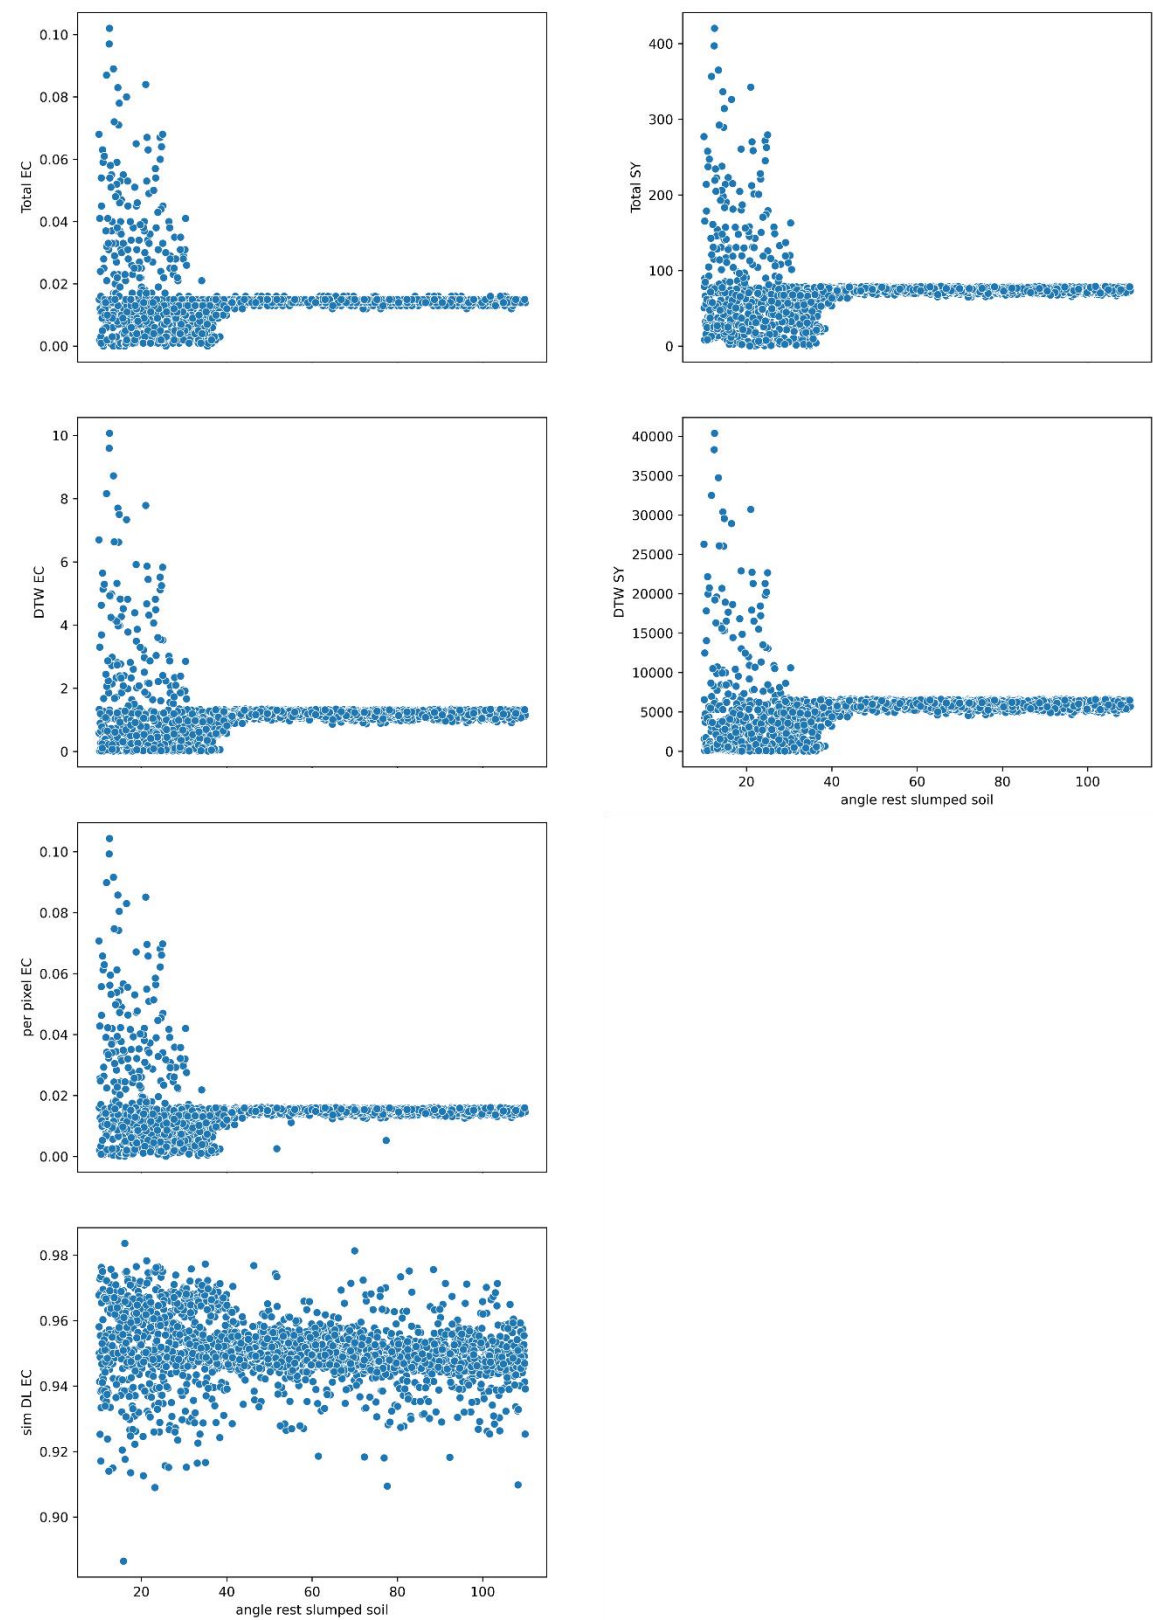

Supplement: Supplementary file 2 [file soil-11-413-2025-supplement.zip]
