# Supplementary material for: Using 3D observations with high spatio-temporal resolution to calibrate and evaluate a process-focused cellular automaton model of soil erosion by water
Source: Copernicus journal article supplement (doi:10.5194/soil-11-413-2025), 2025-06-12
Supplement: Supplementary file 1 [file soil-11-413-2025-supplement.zip]

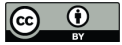

## *Supplement of*

# **Using 3D observations with high spatio-temporal resolution to calibrate and evaluate a process-focused cellular automaton model of soil erosion by water**

**Anette Eltner et al.**

*Correspondence to:* Anette Eltner ([anette.eltner@tu-dresden.de](mailto:anette.eltner@tu-dresden.de))

- [soil-11-413-2025-supplement-title-page.pdf](#)
- [Animation\\_S1.gif](#)
- [Animation\\_S2.gif](#)
- [Supplement.pdf](#)

The copyright of individual parts of the supplement might differ from the article licence.
